# Supplementary material
Source: PubMed Central journal article supplement (PMC8769934)
Supplement: mmc1.pdf [file mmc1.pdf]

**Supplemental information**

**Rapid identification of neutralizing antibodies  
against SARS-CoV-2 variants by mRNA display**

**Shiho Tanaka, C. Anders Olson, Christopher O. Barnes, Wendy Higashide, Marcos Gonzalez, Justin Taft, Ashley Richardson, Marta Martin-Fernandez, Dusan Bogunovic, Priyanthi N.P. Gnanapragasam, Pamela J. Bjorkman, Patricia Spilman, Kayvan Niazi, Shahrooz Rabizadeh, and Patrick Soon-Shiong**

## **Supplemental Information**

### **Rapid Identification of Neutralizing Antibodies against**

### **SARS-CoV-2 Variants by mRNA Display**

**Shiho Tanaka, C. Anders Olson, Christopher O. Barnes, Wendy Higashide, Marcos Gonzalez, Justin Taft, Ashley Richardson, Marta Martin-Fernandez, Dusan Bogunovic, Priyanthi N.P. Gnanapragasam, Pamela J. Bjorkman, Patricia Spilman, Kayvan Niazi, Shahrooz Rabizadeh, Patrick Soon-Shiong**

**Supplemental Information**

**Supplementary Tables**

**Table S1. Ten spike binding VH/VL sequences identified by mRNA display (related to Fig. 1 and mRNA display method).**

| Ab        | CDRH1<br>(26-35) | CDRH2<br>(50-58) | CDRH3<br>(93-101) | CDRL3<br>(89-86) |            |
|-----------|------------------|------------------|-------------------|------------------|------------|
| N-612-017 | GFTFSSYAMH       | AIWGSGSNTY       | ARGRDLAAFTKTA     | QQHDALPW         |            |
| N-612-056 | GFTFSSYAMS       | LISGSGGSTY       | ARDLWGSFFA        | QQDAGTPL         | RBD binder |
| N-612-074 | GFTFSAYAMH       | AIWGSGGSTY       | ARDLWMAMWFG       | QQRSTYPL         |            |
| N-612-004 | GFTFSSYMH        | AISGSGGYTY       | ARDRDHAYDWG       | QQWADWPL         |            |
| N-612-041 | GFTFSSYTMH       | AISGSGGYTY       | ARDRDLLWMGWA      | QQYANWPL         | SD1 binder |
| N-612-002 | GFTFSSYTMH       | AISGSGGSTY       | ARDLFDWG          | QQDYGFPL         |            |
| N-612-014 | GFTFSSYAMT       | YISGSGGGTY       | ARDRWASGWLA       | QQAYAYPL         | NTD binder |
| N-612-007 | GFTFSNYAMH       | AISGNGGSTG       | ARDRWYVKNA        | QQLDGTPF         |            |
| N-612-044 | GFTFSNYAMH       | AISGSGGSTY       | ARDLSFWLTYHLASA   | QQSYSDPL         | S2 binder  |
| N-612-086 | GFTFSSYAMH       | AISWSGRSTY       | ARDLSSNWGSG       | QQSADTPF         |            |

**Table S2. BLI kinetic parameters obtained for various SARS-CoV-2 Spike domains (RBD, RBD-SD1, S1, S2)(related to Fig. 1 and BLI kinetic analysis method).**

| Analyte     | nAb             | $k_{on}$ (1/Ms) | $k_{off}$ (1/s) | $K_D$ (nM) |
|-------------|-----------------|-----------------|-----------------|------------|
| RBD         | N-612-017       | 6.77E+05        | 3.58E-03        | 5.29       |
|             | N-612-056       | 3.37E+05        | 1.01E-03        | 2.98       |
|             | N-612-074       | 1.33E+05        | 1.48E-03        | 11.1       |
| RBD-SD1     | N-612-017       | 4.56E+05        | 3.94E-03        | 8.65       |
|             | N-612-056       | 3.59E+05        | 1.04E-03        | 2.89       |
|             | N-612-074       | 1.21E+05        | 3.97E-03        | 32.9       |
|             | N-612-004       | 1.51E+05        | 9.79E-04        | 6.49       |
|             | N-612-041       | 2.10E+05        | 3.35E-03        | 16.0       |
| S1          | N-612-017       | 2.77E+05        | 2.04E-03        | 7.37       |
|             | N-612-056       | 1.51E+05        | 5.86E-04        | 3.89       |
|             | N-612-074       | 1.01E+05        | 1.46E-03        | 14.4       |
|             | N-612-004       | 9.92E+04        | 2.13E-04        | 2.15       |
|             | N-612-041       | 1.25E+05        | 1.83E-03        | 14.4       |
|             | N-612-002       | 2.68E+05        | 7.26E-04        | 2.71       |
|             | N-612-014       | 1.76E+05        | 2.18E-03        | 12.4       |
| S2 (Ligand) | N-612-007 (Fab) | 3.70E+05        | 1.40E-03        | 3.79       |
|             | N-612-044 (Fab) | 1.70E+05        | 1.61E-03        | 9.44       |
|             | N-612-086 (Fab) | 2.67E+05        | 0.96E-02        | 11.6       |

**Table S3. BLI kinetic parameters obtained for Spike trimer using bivalent model fit (related to Fig. 1 and BLI kinetic analysis method).**

| Ab        | $k_{on1}$ (1/Ms) | $k_{on2}$ (1/Ms) | $k_{off1}$ (1/s) | $k_{off2}$ (1/s) | Apparent $K_D$ (nM) |
|-----------|------------------|------------------|------------------|------------------|---------------------|
| N-612-017 | 8.35E+04         | 1.55E+00         | <1.0E-07         | 1.69E-02         | <0.001              |
| N-612-056 | 6.24E+04         | 1.94E+00         | <1.0E-07         | 5.15E-02         | <0.001              |
| N-612-074 | 9.23E+04         | 8.12E-01         | <1.0E-07         | 1.89E-01         | <0.001              |
| N-612-004 | 7.60E+04         | 4.24E+00         | <1.0E-07         | 1.00E+00         | <0.001              |
| N-612-041 | 1.11E+05         | 4.06E-01         | <1.0E-07         | 1.75E-01         | <0.001              |
| N-612-002 | 5.69E+04         | 6.82E-02         | <1.0E-07         | 6.76E-02         | <0.001              |
| N-612-014 | 2.54E+04         | 3.82E-03         | 2.29E-07         | 2.82E+00         | 0.0033              |
| N-612-007 | 5.78E+04         | 7.80E-02         | <1.0E-07         | 2.92E-02         | <0.001              |
| N-612-044 | 7.15E+04         | 2.62E+00         | <1.0E-07         | 7.14E-02         | <0.001              |
| N-612-086 | 6.11E+04         | 1.55E-01         | <1.0E-07         | 5.53E-02         | <0.001              |

**Table S4. Developability assay summary table (related to Fig. 1 and developability assay method).**

| Ab                  | Polyreactivity MSD (Fold-over-PBS) | HIC (min)        | BLI-CSI (nm) | Accelerated stability % monomer increase/day | Fab Tm (°C) |
|---------------------|------------------------------------|------------------|--------------|----------------------------------------------|-------------|
| N-612-017           | 3                                  | 10.1             | -0.06        | 0.09                                         | 85          |
| N-612-056           | 7                                  | 11.5             | 0.00         | 0.10                                         | 74          |
| N-612-074           | 31                                 | <b>22.1</b>      | -0.01        | 0.10                                         | 76          |
| N-612-004           | 14                                 | 14.9             | 0.05         | 0.13                                         | 85          |
| N-612-041           | 10                                 | <b>20.4</b>      | 0.05         | <b>0.37</b>                                  | 88          |
| N-612-002           | 22                                 | 13.9             | 0.08         | 0.18                                         | 82          |
| N-612-014           | 4                                  | 12.3             | 0.09         | 0.16                                         | 88          |
| N-612-007           | 10                                 | 11.8             | 0.04         | 0.11                                         | 82          |
| N-612-044           | 8                                  | <b>13.4/15.4</b> | -0.06        | 0.10                                         | 88/91       |
| N-612-086           | 10                                 | 13.2             | 0.07         | 0.11                                         | 88          |
| Acceptance criteria | <50                                | <16              | <0.2         | <0.2                                         | >65 °C      |

**Table S5. Cryo-EM data collection and refinement statistics (related to Figs 3 and 5).**

|                                                 | <b>N-612-017 Fab<br/>SARS-CoV-2 S 6P</b> | <b>N-612-014 Fab<br/>SARS-CoV-2 S 6P</b> | <b>N-612-004 Fab<br/>SARS-CoV-2 S 6P</b> |
|-------------------------------------------------|------------------------------------------|------------------------------------------|------------------------------------------|
| <b>PDB</b>                                      | <b>7S0C</b>                              | <b>7S0D</b>                              | <b>7S0E</b>                              |
| <b>EMD</b>                                      | <b>24786</b>                             | <b>24787</b>                             | <b>24788</b>                             |
| <b>Data collection conditions</b>               |                                          |                                          |                                          |
| Microscope                                      | Talos Arctica                            | Talos Arctica                            | Talos Arctica                            |
| Camera                                          | Gatan K3 Summit                          | Gatan K3 Summit                          | Gatan K3 Summit                          |
| Magnification                                   | 45,000x                                  | 45,000x                                  | 45,000x                                  |
| Voltage (kV)                                    | 200                                      | 200                                      | 200                                      |
| Recording mode                                  | counting                                 | counting                                 | counting                                 |
| Dose rate (e <sup>-</sup> /pixel/s)             | 13.5                                     | 13.3                                     | 13.8                                     |
| Electron dose (e <sup>-</sup> /Å <sup>2</sup> ) | 60                                       | 60                                       | 60                                       |
| Defocus range (µm)                              | 0.7 – 2.0                                | 0.7 – 2.0                                | 0.7 – 2.0                                |
| Pixel size (Å)                                  | 0.8689                                   | 0.8689                                   | 0.8689                                   |
| Micrographs collected                           | 2,585                                    | 3,791                                    | 3,717                                    |
| Micrographs used                                | 2,132                                    | 3,211                                    | 2,047                                    |
| Total extracted particles                       | 282,890                                  | 505,695                                  | 595,163                                  |
| Refined particles                               | 175,986                                  | 389,223                                  | 115,068                                  |
| Particles in final refinement                   | 108,746                                  | 137,684                                  | 107,271                                  |
| Symmetry imposed                                | C1                                       | C1                                       | C1                                       |
| FSC 0.143 (unmasked/masked)                     |                                          |                                          |                                          |
| unmasked                                        | 4.4 Å                                    | 6.4 Å                                    | 7.1 Å                                    |
| masked                                          | 3.2 Å                                    | 3.5 Å                                    | 4.8 Å                                    |
| <b>Refinement and Validation</b>                |                                          |                                          |                                          |
| Initial model used                              | 6XKL                                     | 6XKL                                     | 6XKL                                     |
| Number of atoms                                 |                                          |                                          |                                          |
| Protein                                         | 29,164                                   | 33,650                                   | 5,307                                    |
| Ligand                                          | 434                                      | 873                                      | 28                                       |
| MapCC (global/local)                            | 0.81/0.78                                | 0.79/0.76                                | 0.87/0.69                                |
| Map sharpening B-factor                         | 65.8                                     | 75.3                                     | 155                                      |
| R.m.s. deviations                               |                                          |                                          |                                          |
| Bond lengths (Å)                                | 0.01                                     | 0.005                                    | 0.02                                     |
| Bond angles (°)                                 | 0.9                                      | 0.89                                     | 1.5                                      |
| MolProbity score                                | 2                                        | 2.2                                      | 2.46                                     |
| Clashscore (all atom)                           | 13.4                                     | 17.7                                     | 7.9                                      |
| Poor rotamers (%)                               | 0.2                                      | 0.1                                      | 0                                        |
| Ramachandran plot                               |                                          |                                          |                                          |
| Favored (%)                                     | 94.7                                     | 93.4                                     | 92.8                                     |
| Allowed (%)                                     | 5.1                                      | 6                                        | 6.3                                      |
| Disallowed (%)                                  | 0.2                                      | 0.6                                      | 0.9                                      |

**Table S6. X-ray crystallography data collection and refinement statistics (related to Fig. 4).**

| <b>N-612-056 - SARS2-RBD</b>             |                                  |
|------------------------------------------|----------------------------------|
| <b>(12-2, SSRL)</b>                      |                                  |
| <b>PDB ID</b>                            | <b>7S0B</b>                      |
| <b>Data collection<sup>a</sup></b>       |                                  |
| Space group                              | P2 <sub>1</sub> 2 <sub>1</sub> 2 |
| Unit cell (Å)                            | 102.3, 153.7, 96.6               |
| $\alpha, \beta, \gamma$ (°)              | 90, 90, 90                       |
| Wavelength (Å)                           | 0.979                            |
| Resolution (Å)                           | 38.9-2.9 (3.04-2.9)              |
| Unique Reflections                       | 34,420 (4,471)                   |
| Completeness (%)                         | 99.8 (99.1)                      |
| Redundancy                               | 6.6 (6.7)                        |
| CC <sub>1/2</sub> (%)                    | 99.3 (72.8)                      |
| $\langle I/\sigma I \rangle$             | 6.4 (1.5)                        |
| Mosaicity (°)                            | 0.25                             |
| R <sub>merge</sub> (%)                   | 18.7 (133)                       |
| R <sub>pim</sub> (%)                     | 8.3 (59.4)                       |
| Wilson B-factor                          | 56.6                             |
| <b>Refinement and Validation</b>         |                                  |
| Resolution (Å)                           | 384 - 2.9                        |
| Number of atoms                          |                                  |
| Protein                                  | 9,829                            |
| Ligand                                   | 28                               |
| Waters                                   | 0                                |
| R <sub>work</sub> /R <sub>free</sub> (%) | 212/25.4                         |
| R.m.s. deviations                        |                                  |
| Bond lengths (Å)                         | 0.006                            |
| Bond angles (°)                          | 1.2                              |
| MolProbity score                         | 2.47                             |
| Clashscore (all atom)                    | 11.6                             |
| Poor rotamers (%)                        | 5                                |
| Ramachandran plot                        |                                  |
| Favored (%)                              | 94.8                             |
| Allowed (%)                              | 5.2                              |
| Disallowed (%)                           | 0                                |
| Average B-factor (Å)                     | 73.5                             |

<sup>a</sup>Numbers in parentheses correspond to the highest resolution shell

**Table S7. BLI kinetic analysis of N-612-017, N-612-017-01, N-612-017-03, N-612-017-5B02, and N-612-017-5B05 against RBD-WT, RBD-B.1.351 (K417N/E484K/N501Y) and RBD-L452R (related to Fig. 7 and BLI kinetic analysis method).**

|                | RBD-WT          |                 |            | RBD-B.1.351     |                 |            | RBD-L452R       |                 |            |
|----------------|-----------------|-----------------|------------|-----------------|-----------------|------------|-----------------|-----------------|------------|
|                | $k_{on}$ (1/Ms) | $k_{off}$ (1/s) | $K_D$ (nM) | $k_{on}$ (1/Ms) | $k_{off}$ (1/s) | $K_D$ (nM) | $k_{on}$ (1/Ms) | $k_{off}$ (1/s) | $K_D$ (nM) |
| N-612-017      | 6.77E+05        | 3.58E-03        | 5.29       | 4.45E+05        | 1.36E-02        | 30.6       | --              | --              | N.B.       |
| N-612-017-01   | 5.59E+05        | 3.59E-04        | 0.64       | 5.31E+05        | 4.06E-04        | 0.77       | 2.34E+05        | 7.75E-03        | 33.1       |
| N-612-017-03   | 6.48E+05        | 1.60E-04        | 0.25       | 6.47E+05        | 2.33E-04        | 0.36       | 1.18E+05        | 6.90E-03        | 58.7       |
| N-612-017-5B02 | 8.24E+05        | 9.26E-05        | 0.11       | 7.99E+05        | 1.20E-04        | 0.15       | 5.74E+05        | 3.54E-03        | 6.16       |
| N-612-017-5B05 | 9.62E+05        | 3.16E-03        | 3.28       | 9.68E+05        | 2.48E-03        | 2.56       | 8.01E+05        | 1.96E-03        | 2.44       |

## Supplemental Figures

**Figure S1**

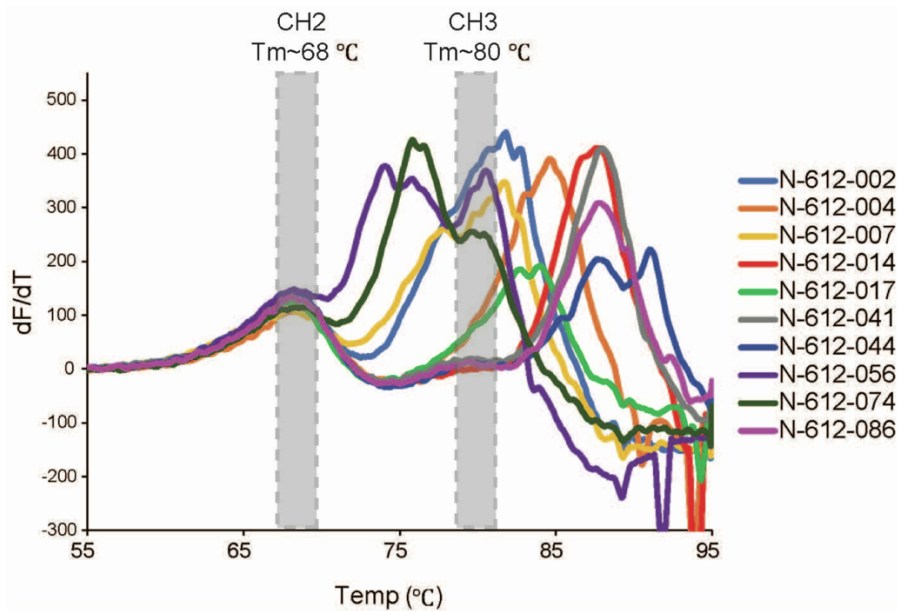

**Figure S1. T<sub>m</sub> thermograms of 10 Abs identified from mRNA library display (related to Fig. 1 and developability assay method).**

Figure S2

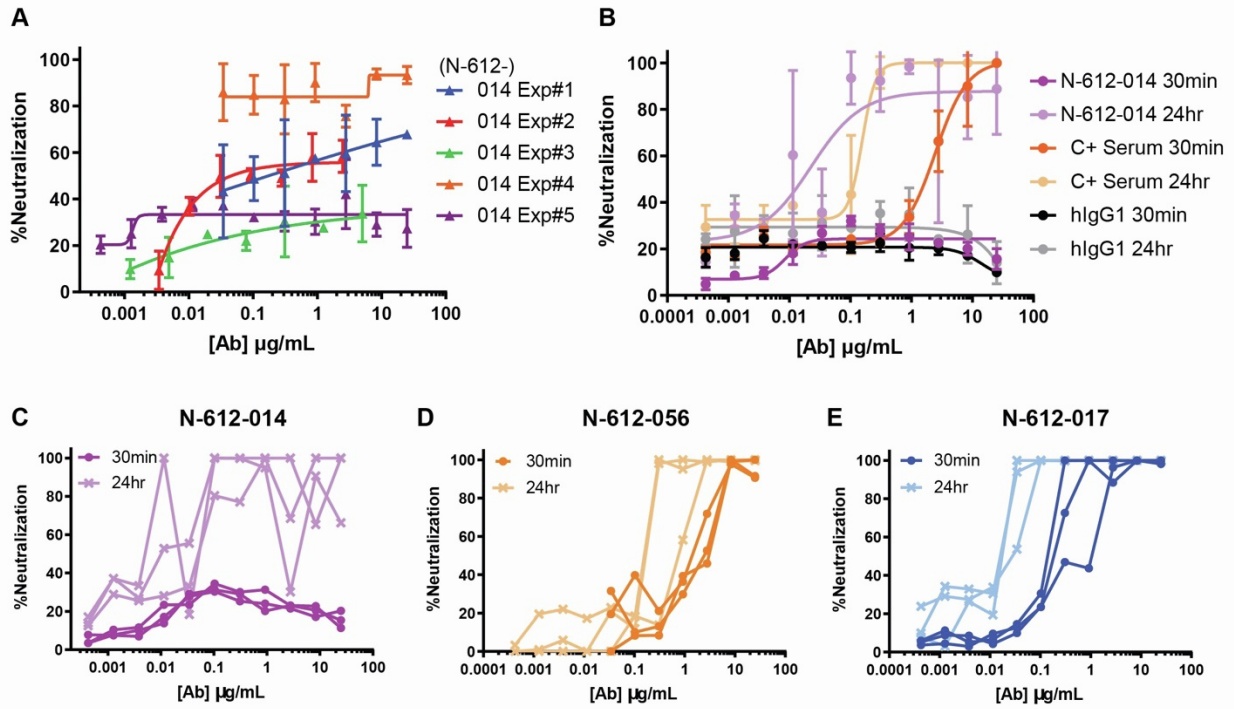

Figure S2. Vero E6 live virus neutralization assay (related to Fig. 2 and Vero E6 neutralization assay method). (A) Neutralization activity of N-612-014 in 5 separate experiments with 30 min virus-antibody incubation. (B) Comparison of neutralization activity of N-612-014 and positive control convalescent serum (C+) with 30 min. vs 24 hr virus-antibody incubation. Comparison of 30 min and 24 hr virus-antibody incubation for: (C) N-612-014, (D) N-612-056, and (E) N-612-017.



Figure S3

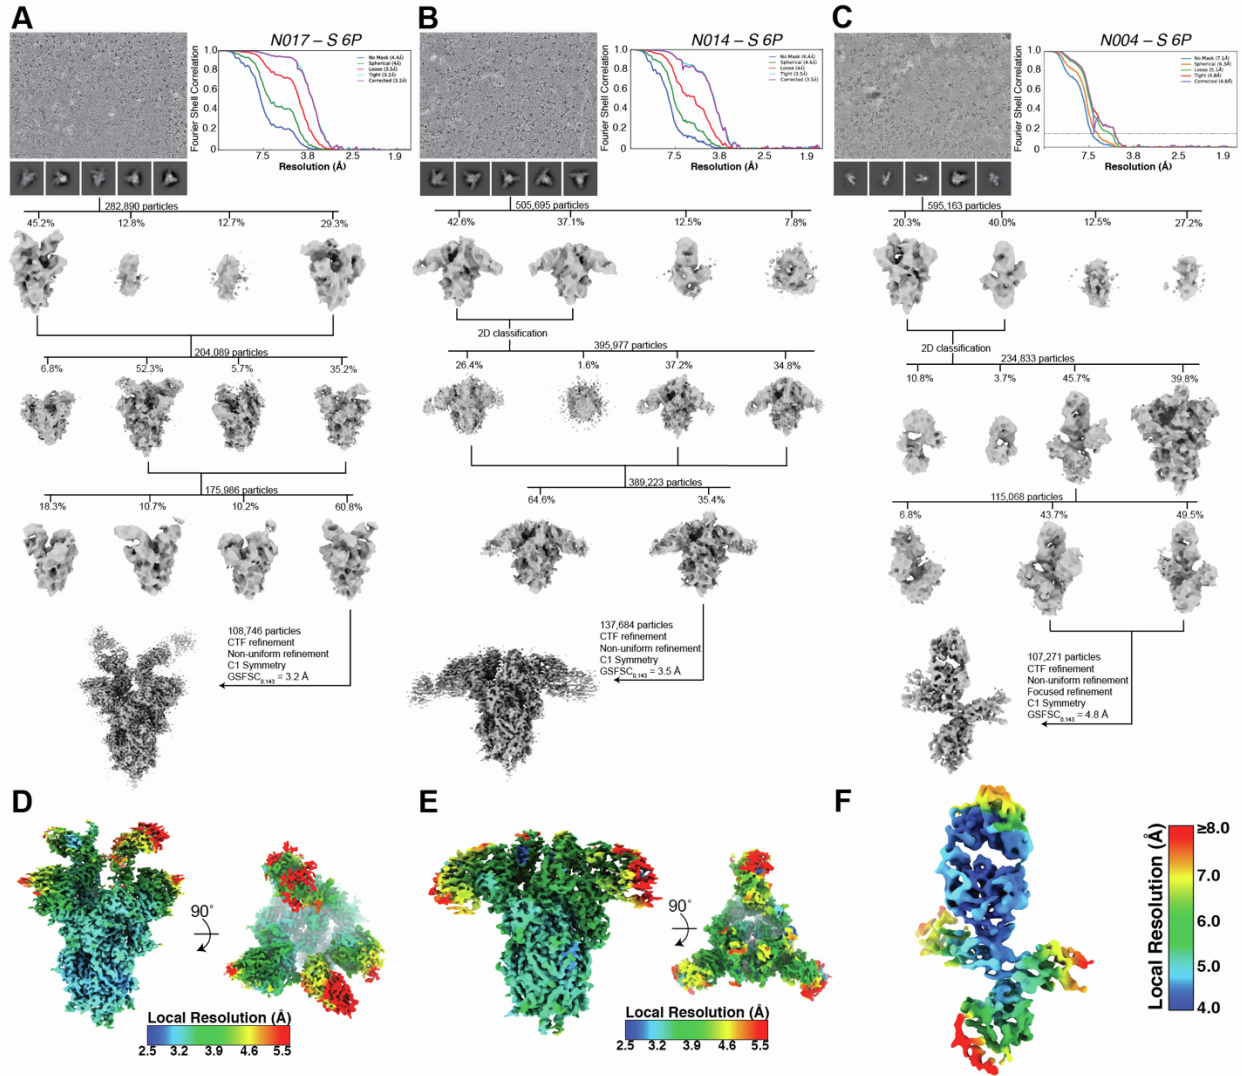

**Figure S3. Cryo-EM data processing and validation (related to Figs 3 and 5).** (A-C) Representative micrograph, 2D class averages, data processing workflow, and Gold Standard FSC plots for the final reconstructions of (A) N-612-017 – S 6P, (B) N-612-014 – S 6P, and (C) N-612-056 – S 6P complexes. (D-F) Local resolution estimates calculated in cryoSPARC v3.1 for (D) N-612-017 – S 6P, (E) N-612-014 – S 6P, and (F) N-612-056 – S 6P complexes.

Figure S4

|                  | EX1      | EX2      | EX3      | EX4      |
|------------------|----------|----------|----------|----------|
| No blocking      | 004(SD1) | 004(SD1) | 004(SD1) | 004(SD1) |
|                  | 041(SD1) | 041(SD1) | 041(SD1) | 041(SD1) |
|                  | 056(RBD) | 056(RBD) | 056(RBD) | 056(RBD) |
| Partial Blocking | 002(NTD) | 002(NTD) | 002(NTD) | 002(NTD) |
|                  | 014(NTD) | 014(NTD) | 014(NTD) | 014(NTD) |
|                  | 017(RBD) | 017(RBD) | 017(RBD) | 017(RBD) |
|                  | 074(RBD) | 074(RBD) | 074(RBD) | 074(RBD) |
| Blocking         | 007(S2)  | 007(S2)  | 007(S2)  | 007(S2)  |
|                  | 044(S2)  | 044(S2)  | 044(S2)  | 044(S2)  |
|                  | 086(S2)  | 086(S2)  | 086(S2)  | 086(S2)  |

Figure S4. Convalescent plasma blocking of 10 mAbs binding to SARS-CoV-2 Spike (related to Figs 1 and 2 and convalescent plasma blocking assay method).

Figure S5

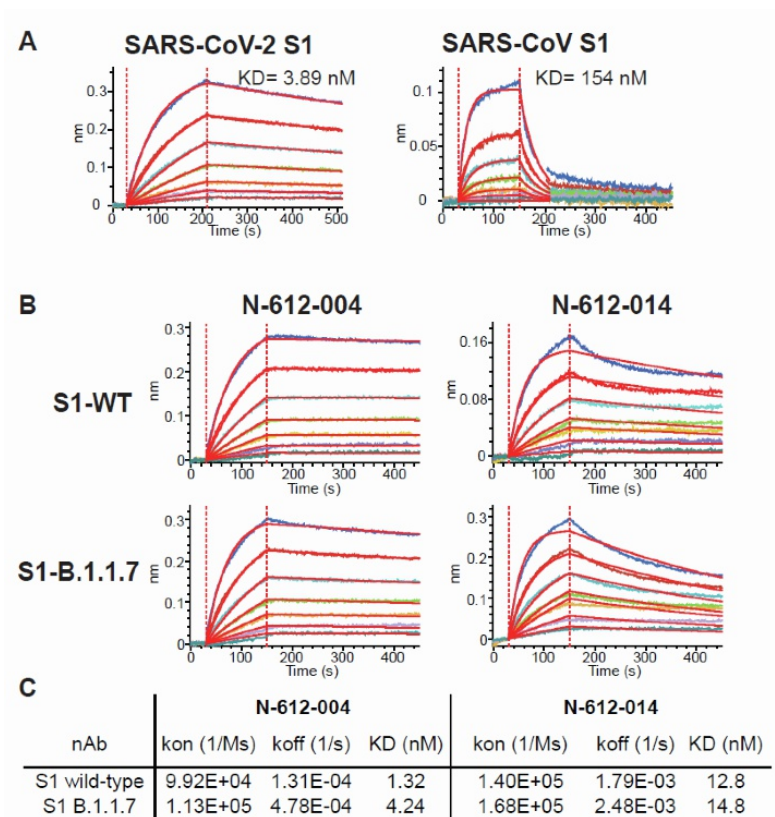

Figure S5: Cross-reactivity of N-612-056 against SARS-CoV (related to Figs 1 and 7 and BLI kinetics analysis method). (A) BLI kinetic analysis of SARS-CoV-2 and SARS-CoV S1 domain binding to N-612-056. (B, C) BLI kinetic analysis of N-612-004 and N-612-014 against S1 domain from WT and B.1.1.7 variant of SARS-CoV-2 Spike protein.
